# Supplementary material for: SARS-CoV-2 is transmitted via contact and via the air between ferrets
Source: PubMed Central journal article supplement (PMC7343828; doi:10.1038/s41467-020-17367-2), 2020-07-08
Supplement: 41467_2020_17367_MOESM1_ESM.pdf [file 41467_2020_17367_MOESM1_ESM.pdf]

## **Supplementary information for**

### **SARS-CoV-2 is transmitted via contact and via the air between ferrets.**

Mathilde Richard<sup>1</sup>, Adinda Kok<sup>1</sup>, Dennis de Meulder<sup>1</sup>, Theo M. Bestebroer<sup>1</sup>, Mart M. Lamers<sup>1</sup>,  
Nisreen M.A. Okba<sup>1</sup>, Martje Fentener van Vlissingen<sup>2</sup>, Barry Rockx<sup>1</sup>, Bart L. Haagmans<sup>1</sup>, Marion P.G.  
Koopmans<sup>1</sup>, Ron A.M. Fouchier<sup>1</sup>, Sander Herfst<sup>1\*</sup>.

<sup>1</sup> Department of Viroscience, Erasmus University Medical Center, Rotterdam, the Netherlands.

<sup>2</sup> Erasmus Laboratory Animal Science Center, Erasmus University Medical Center, Rotterdam, the Netherlands.

\* Corresponding author: [s.herfst@erasmusmc.nl](mailto:s.herfst@erasmusmc.nl)

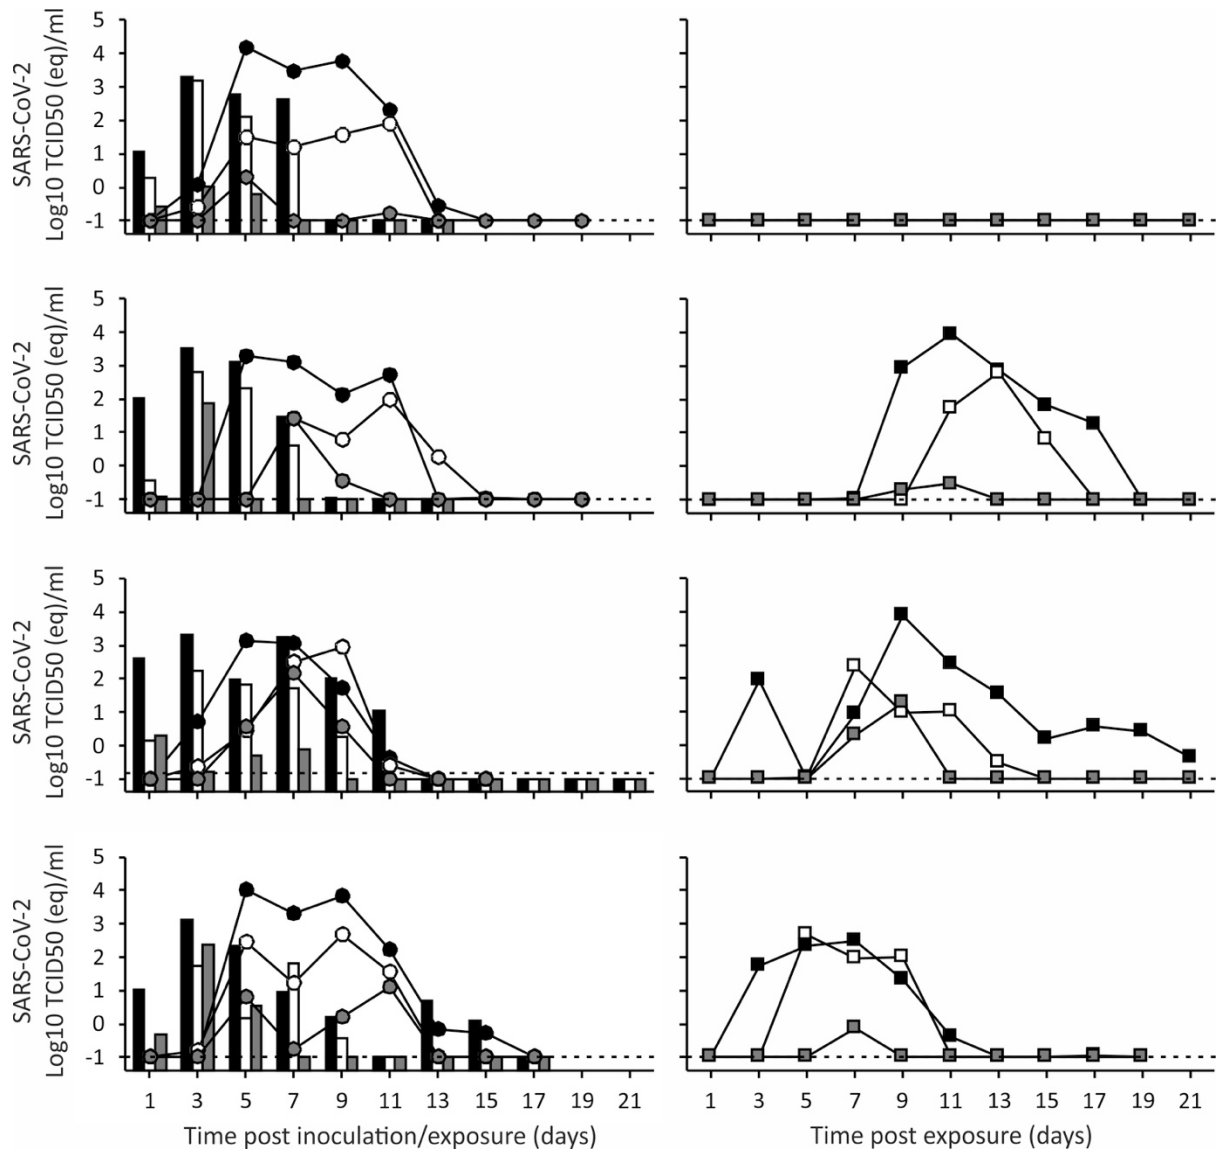

**Supplementary Figure 1. SARS-CoV-2 shedding in ferrets in the transmission experiment.** SARS-CoV-2 viral RNA was detected by RT-qPCR in throat (black), nasal (white) and rectal (grey) swabs collected from donor ferrets (bars; left panels), direct contact ferrets (circles; left panels) and indirect recipient ferrets housed in separate cages (squares; right panels). Swabs were collected from each ferret every other day until no viral RNA could be detected in any of the three swabs. TCID<sub>50</sub> equivalent (eq) were calculated from on a standard curve of serial dilutions of the SARS-CoV-2 viral stock. The dotted line indicates the detection limit.

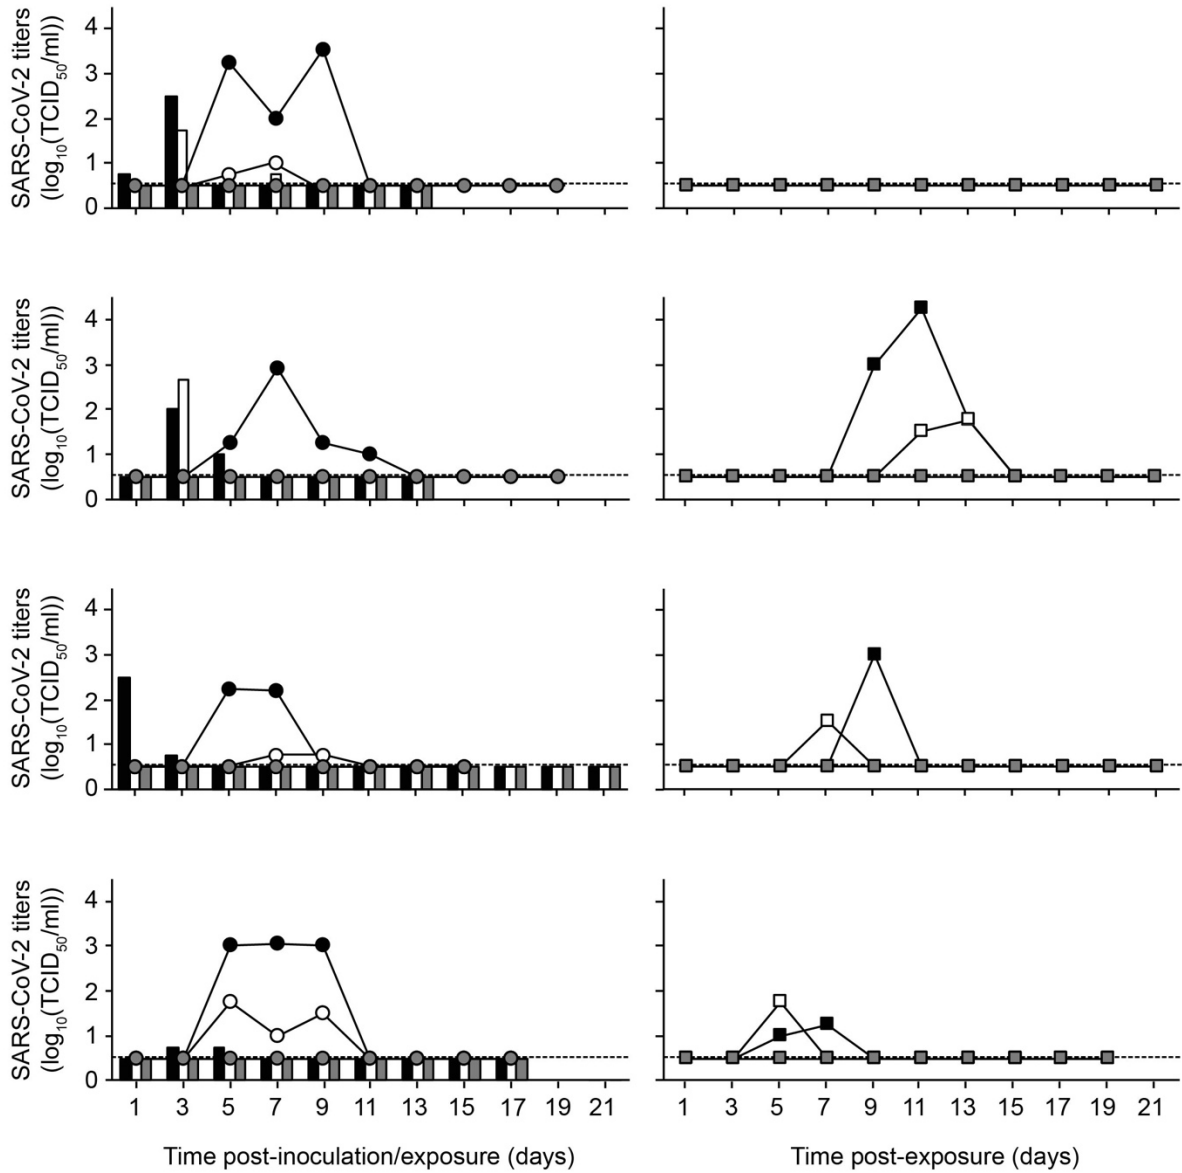

**Supplementary Figure 2. SARS-CoV-2 shedding in ferrets in the transmission experiment.** SARS-CoV-2 was detected by end-point titration in VeroE6 cells in throat (black), nasal (white) and rectal (grey) swabs collected from donor ferrets (bars; left panels), direct contact ferrets (circles; left panels) and indirect recipient ferrets housed in separate cages (squares; right panels). Swabs were collected from each ferret every other day until no viral RNA could be detected in any of the three swabs. The dotted line indicates the detection limit.

**Supplementary Table 1. Detection of SARS-CoV-2 RNA and infectious virus in swabs of ferrets.**

|     |  | Donor Ferrets        |                  |              |                 |              |               |
|-----|--|----------------------|------------------|--------------|-----------------|--------------|---------------|
|     |  | Nasal swabs          |                  | Throat swabs |                 | Rectal swabs |               |
| DPI |  | RT-qPCR <sup>#</sup> | Virus culture    | RT-qPCR      | Virus culture   | RT-qPCR      | Virus culture |
| 1   |  | 4/4                  | 0/4              | 4/4          | 2/4 (0,75-2,50) | 4/4          | 0/4           |
| 3   |  | 4/4                  | 2/4 (1,75-2,75)* | 4/4          | 4/4 (0,75-2,50) | 4/4          | 0/4           |
| 5   |  | 4/4                  | 0/4              | 4/4          | 2/4 (0,75-1,00) | 4/4          | 0/4           |
| 7   |  | 4/4                  | 1/4 (0,75)       | 4/4          | 0/4             | 4/4          | 0/4           |
| 9   |  | 4/4                  | 0/4              | 4/4          | 0/4             | 2/4          | 0/4           |
| 11  |  | 3/4                  | 0/4              | 4/4          | 0/4             | 2/4          | 0/4           |
| 13  |  | 2/4                  | 0/4              | 2/4          | 0/4             | 1/4          | 0/4           |
| 15  |  | 0/2                  | 0/2              | 2/2          | 0/2             | 2/2          | 0/2           |
| 17  |  | 0/2                  | 0/2              | 1/2          | 0/2             | 0/2          | 0/2           |
| 19  |  | 1/1                  | 0/1              | 1/1          | 0/1             | 0/1          | 0/1           |
| 21  |  | 0/1                  | 0/1              | 0/1          | 0/1             | 0/1          | 0/1           |

  

|     |  | Direct contact ferrets |                 |              |                 |              |               |
|-----|--|------------------------|-----------------|--------------|-----------------|--------------|---------------|
|     |  | Nasal swabs            |                 | Throat swabs |                 | Rectal swabs |               |
| DPE |  | RT-qPCR                | Virus culture   | RT-qPCR      | Virus culture   | RT-qPCR      | Virus culture |
| 1   |  | 1/4                    | 0/4             | 1/4          | 0/4             | 0/4          | 0/4           |
| 3   |  | 4/4                    | 0/4             | 4/4          | 0/4             | 3/4          | 0/4           |
| 5   |  | 4/4                    | 2/4 (0,75-1,75) | 4/4          | 4/4 (1,25-3,25) | 4/4          | 0/4           |
| 7   |  | 4/4                    | 3/4 (0,75-1,00) | 4/4          | 4/4 (2,00-3,00) | 4/4          | 0/4           |
| 9   |  | 4/4                    | 2/4 (0,75-1,50) | 4/4          | 4/4 (1,25-3,50) | 4/4          | 0/4           |
| 11  |  | 4/4                    | 0/4             | 4/4          | 1/4 (1)         | 4/4          | 0/4           |
| 13  |  | 4/4                    | 0/4             | 3/4          | 0/4             | 0/4          | 0/4           |
| 15  |  | 1/4                    | 0/4             | 3/4          | 0/4             | 0/4          | 0/4           |
| 17  |  | 1/3                    | 0/3             | 1/3          | 0/3             | 1/3          | 0/3           |
| 19  |  | 0/2                    | 0/2             | 0/2          | 0/2             | 0/2          | 0/2           |
| 21  |  | NT                     | NT              | NT           | NT              | NT           | NT            |

  

|     |  | Indirect recipient ferrets |               |              |               |              |               |
|-----|--|----------------------------|---------------|--------------|---------------|--------------|---------------|
|     |  | Nasal swabs                |               | Throat swabs |               | Rectal swabs |               |
| DPE |  | RT-qPCR                    | Virus culture | RT-qPCR      | Virus culture | RT-qPCR      | Virus culture |
| 1   |  | 0/4                        | 0/4           | 0/4          | 0/4           | 0/4          | 0/4           |
| 3   |  | 0/4                        | 0/4           | 2/4          | 0/4           | 0/4          | 0/4           |
| 5   |  | 2/4                        | 1/4 (1,75)    | 2/4          | 1/4 (1,00)    | 1/4          | 0/4           |
| 7   |  | 2/4                        | 1/4 (1,50)    | 3/4          | 1/4 (1,25)    | 2/4          | 0/4           |
| 9   |  | 2/4                        | 0/4           | 3/4          | 2/4 (3,00)    | 3/4          | 0/4           |
| 11  |  | 2/4                        | 1/4 (1,50)    | 3/4          | 1/4 (4,25)    | 2/4          | 0/4           |
| 13  |  | 2/4                        | 1/4 (1,75)    | 3/4          | 1/4 (1,75)    | 1/4          | 0/4           |
| 15  |  | 1/4                        | 0/4           | 3/4          | 0/4           | 1/4          | 0/4           |
| 17  |  | 2/4                        | 0/4           | 3/4          | 0/4           | 0/4          | 0/4           |
| 19  |  | 2/4                        | 0/4           | 2/4          | 0/4           | 0/4          | 0/4           |
| 21  |  | 1/3                        | 0/3           | 1/3          | 0/3           | 1/3          | 0/3           |

<sup>#</sup>Number of animals positive per number of animals tested

\*Range of virus titers found in positive samples (in TCID<sub>50</sub>/ml)

NT: not tested; DPI: days post-inoculation; DPE: days post-exposure

## Supplementary Table 2. Detection of single nucleotide polymorphisms by Illumina sequencing

a

Single nucleotide polymorphisms in the ferret samples present at >5%

|                | Nt change | Aa change  | Protein  | Reads with the specified substitution (%) |      |      |
|----------------|-----------|------------|----------|-------------------------------------------|------|------|
|                |           |            |          | Time after inoculation (days)             |      |      |
|                |           |            |          | 1                                         | 3    | 7    |
| Donor ferret 1 | C713T     | Synonymous | NA       | 22,4                                      | <5   | <5   |
|                | C11718T   | L260F      | Nsp6     | <5                                        | 47,1 | 44,0 |
|                | A23032C   | N501T      | Spike    | 31,0                                      | 93,4 | 99,2 |
|                | A23586G   | S686G      | Spike    | 57,4                                      | 98,4 | 99,7 |
| Donor ferret 2 | C11559T   | L207F      | Nsp6     | <5                                        | 10,4 | 13,4 |
|                | A23032C   | N501T      | Spike    | 40,9                                      | 97,7 | 99,7 |
|                | A23586G   | S686G      | Spike    | 62,3                                      | 99,1 | 99,6 |
| Donor ferret 3 | A23032C   | N501T      | Spike    | 14,7                                      | 86,4 | 89,4 |
|                | G23584A   | R685H      | Spike    | 9,4                                       | <5   | 6,0  |
|                | A23586G   | S686G      | Spike    | 62,9                                      | 93,3 | 89,2 |
| Donor ferret 4 | C17442T   | T413I      | Helicase | <5                                        | <5   | 6,7  |
|                | A23032C   | N501T      | Spike    | 49,6                                      | 98,7 | 66,2 |
|                | G23584A   | R685H      | Spike    | 5,8                                       | <5   | <5   |
|                | A23586G   | S686G      | Spike    | 74,3                                      | 99,0 | 64,0 |

b

Presence of the ferret sample single nucleotide polymorphisms in the virus stocks (>1%)

| Nt change | Aa position | Protein  | Reads with the specified substitution (%) |                       |
|-----------|-------------|----------|-------------------------------------------|-----------------------|
|           |             |          | Virus stock P1                            | Virus stock P3 VeroE6 |
| C713T     | Synonymous  | NA       | <1                                        | <1                    |
| C11559T   | L207F       | Nsp6     | <1                                        | <1                    |
| C11718T   | L260F       | Nsp6     | <1                                        | <1                    |
| C17442T   | T413I       | Helicase | <1                                        | <1                    |
| A23032C   | N501T       | Spike    | <1                                        | <1                    |
| G23584A   | R685H       | Spike    | 2,0                                       | <1                    |
| A23586G   | S686G       | Spike    | 15,2                                      | 8,1                   |

Nt: nucleotide; Aa: amino acid; NA: not applicable

**Supplementary Table 3. Sequences of primers used for the generation of amplicons for whole genome sequencing and next-generation sequencing**

| Mix 1               |                                |             |        |
|---------------------|--------------------------------|-------------|--------|
| Name                | Sequence                       | Orientation | Volume |
| SARS-CoV-2_1_LEFT   | ACCAACCAACTTTCGATCTCTTGT       | FWD         | 10µl   |
| SARS-CoV-2_1_RIGHT  | CGAGCATCCGAACGTTTGATGA         | REV         | 10µl   |
| SARS-CoV-2_3_LEFT   | ACGAGCTTGGCACTGATCCTTA         | FWD         | 10µl   |
| SARS-CoV-2_3_RIGHT  | GGTTGCATTCATTTGGTGACGC         | REV         | 10µl   |
| SARS-CoV-2_5_LEFT   | TGTCCAGCATGTCACAATTCAGA        | FWD         | 10µl   |
| SARS-CoV-2_5_RIGHT  | TACAACACGAGCAGCCTCTGAT         | REV         | 10µl   |
| SARS-CoV-2_7_LEFT   | TGGCACTGTTTATGAAAACTCAAACC     | FWD         | 10µl   |
| SARS-CoV-2_7_RIGHT  | TTTCGAGCAACATAAGCCCGTT         | REV         | 10µl   |
| SARS-CoV-2_9_LEFT   | TCACTTTTGAACCTTGATGAAAGGATTGA  | FWD         | 10µl   |
| SARS-CoV-2_9_RIGHT  | GATTGTCCTCACTGCCGTCTTG         | REV         | 10µl   |
| SARS-CoV-2_11_LEFT  | AAACATGGAGGAGGTGTTGCAG         | FWD         | 20µl   |
| SARS-CoV-2_11_RIGHT | TCTTGTTTTCTCTGTTCAACTGAAGGT    | REV         | 20µl   |
| SARS-CoV-2_13_LEFT  | GCTCCATATATAGTGGGTGATGTTGT     | FWD         | 10µl   |
| SARS-CoV-2_13_RIGHT | AGCCATGTGTTACATAGCCAAGTG       | REV         | 10µl   |
| SARS-CoV-2_15_LEFT  | CTATTCTGGACAATCTACACAAGTAGGT   | FWD         | 10µl   |
| SARS-CoV-2_15_RIGHT | AGCATCTGTAGAGCAGGTGGA          | REV         | 10µl   |
| SARS-CoV-2_17_LEFT  | GCTGTTATGTACATGGGCACACT        | FWD         | 10µl   |
| SARS-CoV-2_17_RIGHT | GCTTGCCTTTGGATATGGTTGG         | REV         | 10µl   |
| SARS-CoV-2_19_LEFT  | TGTTACATAAACCTATTGTTTGGCATGT   | FWD         | 10µl   |
| SARS-CoV-2_19_RIGHT | TCCAAGGGACACTATTAACAGCA        | REV         | 10µl   |
| SARS-CoV-2_21_LEFT  | AGCAAAGAATACTGTTAAGAGTGTCGG    | FWD         | 20µl   |
| SARS-CoV-2_21_RIGHT | TCGGGGCCATTTGTACAAGATT         | REV         | 20µl   |
| SARS-CoV-2_23_LEFT  | ACTATTGTTAATGGTGTAGAAAGGTCCT   | FWD         | 10µl   |
| SARS-CoV-2_23_RIGHT | GCAACTTCCGCACTATCACCAA         | REV         | 10µl   |
| SARS-CoV-2_25_LEFT  | TGTCTTAAATTGTACATCAATCTGACAT   | FWD         | 10µl   |
| SARS-CoV-2_25_RIGHT | TCACGAGTGACACCACCATCAA         | REV         | 10µl   |
| SARS-CoV-2_27_LEFT  | CTGGTTTGCCTGGCAGATATT          | FWD         | 10µl   |
| SARS-CoV-2_27_RIGHT | TCTACACCACAGAAAACCTCCTGGT      | REV         | 10µl   |
| SARS-CoV-2_29_LEFT  | ACAGTCATGTAGTTGCCTTTAATACTTTAC | FWD         | 10µl   |
| SARS-CoV-2_29_RIGHT | GAGCCTTTGCGAGATGACAACA         | REV         | 10µl   |
| SARS-CoV-2_31_LEFT  | AACGGTCTTTGGCTTGATGACG         | FWD         | 10µl   |
| SARS-CoV-2_31_RIGHT | ACCTTCTAAGTCTGTGCCAGCA         | REV         | 10µl   |
| SARS-CoV-2_33_LEFT  | TGTGGCTATGAAGTACAATTATGAACCT   | FWD         | 10µl   |
| SARS-CoV-2_33_RIGHT | AGCTACAGTGGCAAGAGAAGGT         | REV         | 10µl   |
| SARS-CoV-2_35_LEFT  | TGGTGCTAGGAGAGTGTGGACA         | FWD         | 10µl   |
| SARS-CoV-2_35_RIGHT | GGCTACTTTGATACAAGGTTTGCC       | REV         | 10µl   |
| SARS-CoV-2_37_LEFT  | CTTTCCATGCAGGGTGCTGTAG         | FWD         | 10µl   |
| SARS-CoV-2_37_RIGHT | GTTTGGCTGCTGTTGTAAGAGGT        | REV         | 10µl   |

|                     |                               |     |      |
|---------------------|-------------------------------|-----|------|
| SARS-CoV-2_39_LEFT  | ACAATTCACCTAATTTAGCATGGCCT    | FWD | 10µl |
| SARS-CoV-2_39_RIGHT | TTGGTTGTCCCCACTAGCTAG         | REV | 10µl |
| SARS-CoV-2_41_LEFT  | AGTATGTACAAATACCTACAACCTGTGCT | FWD | 10µl |
| SARS-CoV-2_41_RIGHT | AGCATAGACGAGGTCTGCCATT        | REV | 10µl |
| SARS-CoV-2_43_LEFT  | TGGTATTGTTGGTGTACTGACATTAGA   | FWD | 10µl |
| SARS-CoV-2_43_RIGHT | AGGGTCAGCAGCATAACAAGT         | REV | 10µl |
| SARS-CoV-2_45_LEFT  | CACTTCTTCTTTGCTCAGGATGGT      | FWD | 10µl |
| SARS-CoV-2_45_RIGHT | AACATGTTGTGCCAACCACCAT        | REV | 10µl |
| SARS-CoV-2_47_LEFT  | TGTAGCTTGTACACCGTTTCT         | FWD | 10µl |
| SARS-CoV-2_47_RIGHT | AGTAAGGTCAGTCTCAGTCCAACA      | REV | 10µl |
| SARS-CoV-2_49_LEFT  | AGGAGTATGCTGATGTCTTTCATTTGT   | FWD | 10µl |
| SARS-CoV-2_49_RIGHT | CACCAGCATTGTCCAGTCACA         | REV | 10µl |
| SARS-CoV-2_51_LEFT  | TCTTTCATGGGAAGTTGGTAAACCT     | FWD | 20µl |
| SARS-CoV-2_51_RIGHT | TCACATAGTGCATCAACAGCGG        | REV | 20µl |
| SARS-CoV-2_53_LEFT  | TGTCAATGCCAGATTAYGTGCT        | FWD | 10µl |
| SARS-CoV-2_53_RIGHT | CAAGAGTGAGCTGTTTCAGTGGT       | REV | 10µl |
| SARS-CoV-2_55_LEFT  | TGTTGACACTAAATTCAAAAGTGAAGGT  | FWD | 20µl |
| SARS-CoV-2_55_RIGHT | TGTCAACTCAAAGCCATGTGCC        | REV | 20µl |
| SARS-CoV-2_57_LEFT  | CGTTTATGATTGATGTTCAACAATGGGG  | FWD | 10µl |
| SARS-CoV-2_57_RIGHT | ACAACCAGGCAAGTTAAGGTTAGA      | REV | 10µl |
| SARS-CoV-2_59_LEFT  | AGTCTCATGAAAACAAGTAGTGCA      | FWD | 10µl |
| SARS-CoV-2_59_RIGHT | ATTAGCAGCAATGTCCACACCC        | REV | 10µl |
| SARS-CoV-2_61_LEFT  | AGAAATGCCCGTAATGGTGTCT        | FWD | 10µl |
| SARS-CoV-2_61_RIGHT | TGAACCTGTTTGCGCATCTGTT        | REV | 10µl |
| SARS-CoV-2_63_LEFT  | TGGCCATGTAGAAACATTTTACCCA     | FWD | 10µl |
| SARS-CoV-2_63_RIGHT | ATAGCCACGGAACCTCCAAGAG        | REV | 10µl |
| SARS-CoV-2_65_LEFT  | GGCAAACCACGCGAACAATAR         | FWD | 10µl |
| SARS-CoV-2_65_RIGHT | ACCTCTTAGTACCATTGGTCCCA       | REV | 10µl |
| SARS-CoV-2_67_LEFT  | CAATTTTGTAAATGATCCATTTTGGGTGT | FWD | 10µl |
| SARS-CoV-2_67_RIGHT | GGTCAAGTGACAGTCTACAGC         | REV | 10µl |
| SARS-CoV-2_69_LEFT  | ACTGTGTTGCTGATTATTCTGTCCT     | FWD | 20µl |
| SARS-CoV-2_69_RIGHT | TAGGTCCACAAACAGTTGCTGG        | REV | 20µl |
| SARS-CoV-2_71_LEFT  | ACTTCTAACCAGGTTGCTGTTCTT      | FWD | 10µl |
| SARS-CoV-2_71_RIGHT | CAGCTATTCCAGTTAAAGCACGGT      | REV | 10µl |
| SARS-CoV-2_73_LEFT  | CTTGCAGATGCTGGCTTCATCA        | FWD | 10µl |
| SARS-CoV-2_73_RIGHT | TGCACTTCAGCCTCAACTTTGT        | REV | 10µl |
| SARS-CoV-2_75_LEFT  | CTTCCCTCAGTCAGCACCTCAT        | FWD | 10µl |
| SARS-CoV-2_75_RIGHT | CAAGCCAGCTATAAAACCTAGCCA      | REV | 10µl |
| SARS-CoV-2_77_LEFT  | TGGAACTGTAACCTTTGAAGCAAGGT    | FWD | 10µl |
| SARS-CoV-2_77_RIGHT | GACTTGTTGTGCCATCACCTGA        | REV | 10µl |
| SARS-CoV-2_79_LEFT  | GGTGTGAAACATGTTACCTTCTTCAT    | FWD | 10µl |
| SARS-CoV-2_79_RIGHT | GTACCGTTGGAATCTGCCATGG        | REV | 10µl |
| SARS-CoV-2_81_LEFT  | CTTGTTTTGTGCTTGCTGCTGT        | FWD | 10µl |

|                     |                           |     |      |
|---------------------|---------------------------|-----|------|
| SARS-CoV-2_81_RIGHT | ACTGCTACTGGAATGGTCTGTGT   | REV | 10µl |
| SARS-CoV-2_83_LEFT  | TGAAGAGCAACCAATGGAGATTGA  | FWD | 10µl |
| SARS-CoV-2_83_RIGHT | TGTTTCGTTTAGGCGTGACAAGT   | REV | 10µl |
| SARS-CoV-2_85_LEFT  | AGCACCTTTAATTGAATTGTGCGTG | FWD | 10µl |
| SARS-CoV-2_85_RIGHT | CGTCTGGTAGCTCTTCGGTAGT    | REV | 10µl |
| SARS-CoV-2_87_LEFT  | AAAAGATCACATTGGCACCCGC    | FWD | 10µl |
| SARS-CoV-2_87_RIGHT | CGACATTCCGAAGAACGCTGAA    | REV | 10µl |
| SARS-CoV-2_89_LEFT  | AGGCTGATGAAACTCAAGCCTT    | FWD | 20µl |
| SARS-CoV-2_89_RIGHT | AAAATCACATGGGGATAGCACTACT | REV | 20µl |

Mix 2

| Name                | Sequence                       | Orientation | Volume |
|---------------------|--------------------------------|-------------|--------|
| SARS-CoV-2_2_LEFT   | TCGTACGTGGCTTTGGAGACTC         | FWD         | 10µl   |
| SARS-CoV-2_2_RIGHT  | ATGCACTCAAGAGGGTAGCCAT         | REV         | 10µl   |
| SARS-CoV-2_4_LEFT   | ACACCTTCAATGGGGAATGTCC         | FWD         | 10µl   |
| SARS-CoV-2_4_RIGHT  | AGGCACACTTGTATGGCAACC          | REV         | 10µl   |
| SARS-CoV-2_6_LEFT   | TGTGAAAGGTTTGGATTATAAAGCATTCA  | FWD         | 10µl   |
| SARS-CoV-2_6_RIGHT  | ACAGGTGACAATTTGTCCACCG         | REV         | 10µl   |
| SARS-CoV-2_8_LEFT   | AGGGAGAAACACTTCCCACAGA         | FWD         | 10µl   |
| SARS-CoV-2_8_RIGHT  | AATCAATGCCCAGTGGTGTAAGT        | REV         | 10µl   |
| SARS-CoV-2_10_LEFT  | TGAGTATGGTACTGAAGATGATTACCAAG  | FWD         | 10µl   |
| SARS-CoV-2_10_RIGHT | GCCGACAACATGAAGACAGTGT         | REV         | 10µl   |
| SARS-CoV-2_12_LEFT  | ACTGTTTCGCACGAAYGTCTACT        | FWD         | 10µl   |
| SARS-CoV-2_12_RIGHT | CCTGACCCGGGTAAGTGGTTAT         | REV         | 10µl   |
| SARS-CoV-2_14_LEFT  | GTTTCAACTATACAGCGTAAATATAAGGGT | FWD         | 20µl   |
| SARS-CoV-2_14_RIGHT | CGTGTGGAGGTTAATGTTGTCTACT      | REV         | 20µl   |
| SARS-CoV-2_16_LEFT  | AGGTACATGTCAGCATTAAATCACACT    | FWD         | 10µl   |
| SARS-CoV-2_16_RIGHT | AGTTCATACTGAGCAGGTGGTG         | REV         | 10µl   |
| SARS-CoV-2_18_LEFT  | CAGTTACACAACAACCATAAAACCAGT    | FWD         | 10µl   |
| SARS-CoV-2_18_RIGHT | GATTATCCATTCCCTGCGCGTC         | REV         | 10µl   |
| SARS-CoV-2_20_LEFT  | TACAGAAGAGGTTGGCCACACA         | FWD         | 7.5µl  |
| SARS-CoV-2_20_RIGHT | AACACYTAAAGCAGCGTTGAG          | REV         | 7.5µl  |
| SARS-CoV-2_22_LEFT  | AGTTGCAGAGTGGTTTTTGGCA         | FWD         | 10µl   |
| SARS-CoV-2_22_RIGHT | ACTGTAGTGACAAGTCTCTCGCA        | REV         | 10µl   |
| SARS-CoV-2_24_LEFT  | AGCTAATAACACTAAAGGTTCAATGCCT   | FWD         | 10µl   |
| SARS-CoV-2_24_RIGHT | TGACTTTTTGCTACCTGCGCAT         | REV         | 10µl   |
| SARS-CoV-2_26_LEFT  | TGGTTGAAGCAGTTAATTAAGTTACACT   | FWD         | 10µl   |
| SARS-CoV-2_26_RIGHT | TTCAGCAGCCAAAACACAAGCT         | REV         | 10µl   |
| SARS-CoV-2_28_LEFT  | CCTTGAAGGTTCTGTTAGAGTGGT       | FWD         | 10µl   |
| SARS-CoV-2_28_RIGHT | AGGTGTGAACATAACCATCCACTG       | REV         | 10µl   |
| SARS-CoV-2_30_LEFT  | AGAAATGTATCTAAAGTTGCGTAGTGATG  | FWD         | 10µl   |
| SARS-CoV-2_30_RIGHT | CCCTGAGTTGAACATTACCAGCC        | REV         | 10µl   |
| SARS-CoV-2_32_LEFT  | TACCAATGTGCTATGAGGCCCA         | FWD         | 10µl   |
| SARS-CoV-2_32_RIGHT | GCACTACCCAATATGGTACGTCC        | REV         | 10µl   |



|                     |                                |     |       |
|---------------------|--------------------------------|-----|-------|
| SARS-CoV-2_34_LEFT  | GTCCAGAGTACTCAATGGTCTTTGT      | FWD | 10µl  |
| SARS-CoV-2_34_RIGHT | ACCTCTGGCCAAAAACATGACA         | REV | 10µl  |
| SARS-CoV-2_36_LEFT  | CGCTACTTTAGACTGACTCTTGGTG      | FWD | 10µl  |
| SARS-CoV-2_36_RIGHT | ATCACCATTAGCAACAGCCTGC         | REV | 10µl  |
| SARS-CoV-2_38_LEFT  | AGATCTGAGGACAAGAGGGCAA         | FWD | 10µl  |
| SARS-CoV-2_38_RIGHT | TGTCATCAGTGCAAGCAGTTTGT        | REV | 10µl  |
| SARS-CoV-2_40_LEFT  | GGTATGGTACTTGGTAGTTTAGCTGC     | FWD | 10µl  |
| SARS-CoV-2_40_RIGHT | ACGATTGTGCATCAGCTGACTG         | REV | 10µl  |
| SARS-CoV-2_42_LEFT  | TCTCTAACTACCAACATGAAGAAACAATT  | FWD | 20µl  |
| SARS-CoV-2_42_RIGHT | GCAGTTAAAGCCCTGGTCAAGG         | REV | 20µl  |
| SARS-CoV-2_44_LEFT  | TGGACCACTAGTGAGAAAAATATTTGTTG  | FWD | 10µl  |
| SARS-CoV-2_44_RIGHT | ACAGCCACCATCGTAACAATCA         | REV | 10µl  |
| SARS-CoV-2_46_LEFT  | TGCAAAGAATAGAGCTCGCACC         | FWD | 10µl  |
| SARS-CoV-2_46_RIGHT | TGCATTAACATTGGCCGTGACA         | REV | 10µl  |
| SARS-CoV-2_48_LEFT  | CTCTCTGACGATGCTGTTGTGT         | FWD | 10µl  |
| SARS-CoV-2_48_RIGHT | TGCGGTGTGTACATAGCCTCAT         | REV | 10µl  |
| SARS-CoV-2_50_LEFT  | AGGAGGTATGAGCTATTATTGTAAATCACA | FWD | 10µl  |
| SARS-CoV-2_50_RIGHT | GTTGTACCTCGGTAAACAACAGCA       | REV | 10µl  |
| SARS-CoV-2_52_LEFT  | TGCAAATTATCAAAGGTTGGTATGCA     | FWD | 10µl  |
| SARS-CoV-2_52_RIGHT | CCGAGGAACATGTCTGGACCTA         | REV | 10µl  |
| SARS-CoV-2_54_LEFT  | TGGAGAAAAGCTGTCTTTATTTACCT     | FWD | 10µl  |
| SARS-CoV-2_54_RIGHT | GCTTCTTCGCGGGTGATAAACA         | REV | 10µl  |
| SARS-CoV-2_56_LEFT  | ACCACCGCTGGAGATCAATTT          | FWD | 10µl  |
| SARS-CoV-2_56_RIGHT | CGCTTAACAAAGCACTCGTGGA         | REV | 10µl  |
| SARS-CoV-2_58_LEFT  | GCCTTGATGACAAAGCTTATAAAATAGA   | FWD | 10µl  |
| SARS-CoV-2_58_RIGHT | AAACCCACAAGCTAAAGCCAGC         | REV | 10µl  |
| SARS-CoV-2_60_LEFT  | CAGGGTGAAGTACCAGTTTCTATCATT    | FWD | 10µl  |
| SARS-CoV-2_60_RIGHT | GAGTAAAGTAAGTTTCAGGTAATTGTTGG  | REV | 10µl  |
| SARS-CoV-2_62_LEFT  | TCGTTTATGGAGATTTTAGTCATAGTCAGT | FWD | 10µl  |
| SARS-CoV-2_62_RIGHT | TTGCGACATTCATCATTATGCCTTT      | REV | 10µl  |
| SARS-CoV-2_64_LEFT  | CTGTACATACAGCTAATAAATGGGATCTCA | FWD | 10µl  |
| SARS-CoV-2_64_RIGHT | TTTGACCTTCTTTAAAGACATAACAGCA   | REV | 10µl  |
| SARS-CoV-2_66_LEFT  | ACCCCCTGCATACACTAATTCTYT       | FWD | 10µl  |
| SARS-CoV-2_66_RIGHT | ACCCTGTTTTCTTCAAGGTCC          | REV | 10µl  |
| SARS-CoV-2_68_LEFT  | ACATAGAAGTTATTTGACTCCTGGTGA    | FWD | 10µl  |
| SARS-CoV-2_68_RIGHT | CCCTGGAGCGATTTGTCTGACT         | REV | 10µl  |
| SARS-CoV-2_70_LEFT  | CCGGTAGCACACCTTGTAATGG         | FWD | 10µl  |
| SARS-CoV-2_70_RIGHT | CCCCTATTAACAGCCTGCACG          | REV | 10µl  |
| SARS-CoV-2_72_LEFT  | TGTTACCACAGAAATTCTACCAGTGT     | FWD | 10µl  |
| SARS-CoV-2_72_RIGHT | TACCCGCTAACAGTGCAGAAGT         | REV | 10µl  |
| SARS-CoV-2_74_LEFT  | GTGCACTTGAAAACTTCAAGATGT       | FWD | 10µl  |
| SARS-CoV-2_74_RIGHT | TGTTACAAACCAGTGTGTGCCA         | REV | 10µl  |
| SARS-CoV-2_76_LEFT  | GTTGATTTAGGTGACATCTCTGGCA      | FWD | 7.5µl |

|                     |                             |     |       |
|---------------------|-----------------------------|-----|-------|
| SARS-CoV-2_76_RIGHT | AGCGCTCTGAAAAACAGCAAGA      | REV | 7.5µl |
| SARS-CoV-2_78_LEFT  | CTTTGGCTTTGCTGGAAATGCC      | FWD | 10µl  |
| SARS-CoV-2_78_RIGHT | GTGCTTACAAAGGCACGCTAGT      | REV | 10µl  |
| SARS-CoV-2_80_LEFT  | ACGTGAGTCTTGTAACCTTCTTTTT   | FWD | 10µl  |
| SARS-CoV-2_80_RIGHT | AATGACCACATGGAACGCGTAC      | REV | 10µl  |
| SARS-CoV-2_82_LEFT  | GGACCTGCCTAAAGAAATCACTGT    | FWD | 10µl  |
| SARS-CoV-2_82_RIGHT | TGCCCTCGTATGTTCCAGAAGA      | REV | 10µl  |
| SARS-CoV-2_84_LEFT  | CTTCACACTCAAAGAAAGACAGAATGA | FWD | 10µl  |
| SARS-CoV-2_84_RIGHT | ACGAACAACGCACTACAAGACT      | REV | 10µl  |
| SARS-CoV-2_86_LEFT  | GGCCCCAAGGTTTACCCAATAA      | FWD | 10µl  |
| SARS-CoV-2_86_RIGHT | CTGTTGCGACTACGTGATGAGG      | REV | 10µl  |
| SARS-CoV-2_88_LEFT  | TAACACAAGCTTTCGGCAGACG      | FWD | 10µl  |
| SARS-CoV-2_88_RIGHT | GTGGTCTGCATGAGTTTAGGCC      | REV | 10µl  |
