# Supplementary material for: SARS-CoV-2 is transmitted via contact and via the air between ferrets
Source: PubMed Central journal article supplement (PMC7343828; doi:10.1038/s41467-020-17367-2), 2020-07-08
Supplement: 41467_2020_17367_MOESM3_ESM.pdf [file 41467_2020_17367_MOESM3_ESM.pdf]

## Reporting Summary

Nature Research wishes to improve the reproducibility of the work that we publish. This form provides structure for consistency and transparency in reporting. For further information on Nature Research policies, see [Authors & Referees](#) and the [Editorial Policy Checklist](#).

### Statistics

For all statistical analyses, confirm that the following items are present in the figure legend, table legend, main text, or Methods section.

n/a Confirmed

- The exact sample size ( $n$ ) for each experimental group/condition, given as a discrete number and unit of measurement
- A statement on whether measurements were taken from distinct samples or whether the same sample was measured repeatedly
- The statistical test(s) used AND whether they are one- or two-sided  
*Only common tests should be described solely by name; describe more complex techniques in the Methods section.*
- A description of all covariates tested
- A description of any assumptions or corrections, such as tests of normality and adjustment for multiple comparisons
- A full description of the statistical parameters including central tendency (e.g. means) or other basic estimates (e.g. regression coefficient) AND variation (e.g. standard deviation) or associated estimates of uncertainty (e.g. confidence intervals)
- For null hypothesis testing, the test statistic (e.g.  $F$ ,  $t$ ,  $r$ ) with confidence intervals, effect sizes, degrees of freedom and  $P$  value noted  
*Give  $P$  values as exact values whenever suitable.*
- For Bayesian analysis, information on the choice of priors and Markov chain Monte Carlo settings
- For hierarchical and complex designs, identification of the appropriate level for tests and full reporting of outcomes
- Estimates of effect sizes (e.g. Cohen's  $d$ , Pearson's  $r$ ), indicating how they were calculated

*Our web collection on [statistics for biologists](#) contains articles on many of the points above.*

### Software and code

Policy information about [availability of computer code](#)

Data collection

no custom software was used

Data analysis

Porechop, which was used to demultiplex data from the MinION and Illumina sequencing, is available on github at: <https://github.com/rrwick/Porechop>

For manuscripts utilizing custom algorithms or software that are central to the research but not yet described in published literature, software must be made available to editors/reviewers. We strongly encourage code deposition in a community repository (e.g. GitHub). See the Nature Research [guidelines for submitting code & software](#) for further information.

### Data

Policy information about [availability of data](#)

All manuscripts must include a [data availability statement](#). This statement should provide the following information, where applicable:

- Accession codes, unique identifiers, or web links for publicly available datasets
- A list of figures that have associated raw data
- A description of any restrictions on data availability

The datasets generated during and/or analysed during the current study are available from the corresponding author (S.H.) on reasonable request.

### Field-specific reporting

Please select the one below that is the best fit for your research. If you are not sure, read the appropriate sections before making your selection.

- Life sciences       Behavioural & social sciences       Ecological, evolutionary & environmental sciences

## Life sciences study design

All studies must disclose on these points even when the disclosure is negative.

|                 |                                                                                                                                                                                                                                                                                                                   |
|-----------------|-------------------------------------------------------------------------------------------------------------------------------------------------------------------------------------------------------------------------------------------------------------------------------------------------------------------|
| Sample size     | For ethical considerations, the group size of animal experiments is small. A group of 12 ferrets was used: four donor ferrets, four contact recipient ferrets and four indirect recipient ferrets. The results of the transmissions studies are qualitative. Therefore, no sample size calculation was performed. |
| Data exclusions | No data were excluded from the analyses                                                                                                                                                                                                                                                                           |
| Replication     | For the transmission studies, data were replicated by having four independent transmission experiments per virus (see sample size).                                                                                                                                                                               |
| Randomization   | Ferrets were randomly allocated to each group.                                                                                                                                                                                                                                                                    |
| Blinding        | Investigators were blinded while performing RNA isolation, RTqPCR, virus titration and ELISA.                                                                                                                                                                                                                     |

## Reporting for specific materials, systems and methods

We require information from authors about some types of materials, experimental systems and methods used in many studies. Here, indicate whether each material, system or method listed is relevant to your study. If you are not sure if a list item applies to your research, read the appropriate section before selecting a response.

### Materials & experimental systems

### Methods

| n/a                                 | Involvement                                                     | n/a                                 | Involvement                                     |
|-------------------------------------|-----------------------------------------------------------------|-------------------------------------|-------------------------------------------------|
| <input type="checkbox"/>            | <input checked="" type="checkbox"/> Antibodies                  | <input checked="" type="checkbox"/> | <input type="checkbox"/> ChIP-seq               |
| <input type="checkbox"/>            | <input checked="" type="checkbox"/> Eukaryotic cell lines       | <input checked="" type="checkbox"/> | <input type="checkbox"/> Flow cytometry         |
| <input checked="" type="checkbox"/> | <input type="checkbox"/> Palaeontology                          | <input checked="" type="checkbox"/> | <input type="checkbox"/> MRI-based neuroimaging |
| <input type="checkbox"/>            | <input checked="" type="checkbox"/> Animals and other organisms |                                     |                                                 |
| <input checked="" type="checkbox"/> | <input type="checkbox"/> Human research participants            |                                     |                                                 |
| <input checked="" type="checkbox"/> | <input type="checkbox"/> Clinical data                          |                                     |                                                 |

## Antibodies

|                 |                                                                                                                                                                                                          |
|-----------------|----------------------------------------------------------------------------------------------------------------------------------------------------------------------------------------------------------|
| Antibodies used | goat anti-ferret IgG HRP labelled, ab112770, Abcam; SARS-CoV/SARS-CoV-2 Nucleocapsid Antibody, Mouse MAAb, Cat: 40143-MM05, Sino Biological; Goat Anti-Mouse IgG1-HRP, Cat. No.1071-05, SouthernBiotech. |
| Validation      | The antibodies were used according to the manufacturer instructions.                                                                                                                                     |

## Eukaryotic cell lines

Policy information about [cell lines](#)

|                                                                   |                                                                                                |
|-------------------------------------------------------------------|------------------------------------------------------------------------------------------------|
| Cell line source(s)                                               | American Type Culture Collection                                                               |
| Authentication                                                    | None of the cell lines were authenticated                                                      |
| Mycoplasma contamination                                          | All cell lines tested negative for mycoplasma                                                  |
| Commonly misidentified lines (See <a href="#">ICLAC</a> register) | None of the cell lines used in this study have been identified as commonly misidentified lines |

## Animals and other organisms

Policy information about [studies involving animals](#); [ARRIVE guidelines](#) recommended for reporting animal research

|                         |                                                                                              |
|-------------------------|----------------------------------------------------------------------------------------------|
| Laboratory animals      | Mustela putorius furo, female, 6-month old                                                   |
| Wild animals            | The study did not involve wild animals                                                       |
| Field-collected samples | The study did not involve samples collected from the field                                   |
| Ethics oversight        | Independent animal experimentation ethical review committee, license number AVD1010020174312 |

Note that full information on the approval of the study protocol must also be provided in the manuscript.
